# Supplementary material
Source: Research Square preprint supplement (doi:10.21203/rs.3.rs-8913900/v1)

**Additional file 1: Supplementary material**

**Supplementary Figure 1 Porphyrin inhibits αS filament formation *in vitro*.**

Recombinant αS was incubated with DMSO, 5-ALA, hematin, or PPIX under shaking for 72h. After 72 h of incubation, filament formation was measured by ThT fluorescence (a) and sarkosyl-insolubility (b and c). Sarkosyl-insoluble αS analyzed by SDS-PAGE (b); band intensity quantified by Image J software (c) (n = 6). Data are shown as the mean ± SEM, Dunnett’s test was used for statistical analysis (****p < 0.0001).

**Supplementary Figure 2 5-ALA does not affect αS PFFs uptake in mouse primary neuronal cells.**

Mouse primary neurons were treated with Dylight488 labeled αS PFFs. After 24 h of incubation, 5-ALA was added to the culture media, and the uptake of Dylight-labeled PFFs was analyzed after 4 or 24 h by fluorescence microscopy. (a) Representative images at 20x. (b) Fluorescence Dylight488 intensity normalized by DAPI counts 24 h after 5-ALA addition. Twenty-five random fields of view were measured per experiment, this was performed in duplicate (total n = 50). Data are presented as the mean ± SEM, and Dunnett’s test was used for statistical analysis (****p < 0.0001).

**Supplementary Figure 3 No neuron loss in the αS propagation mouse model at 1 month post injection.**

(a) Representative immunostaining images with anti-TH antibody in the striatum (Bregma +0.14 mm) and SN (Bregma −3.52 mm). (b) Comparison of TH-positive neurons in the ipsilateral and contralateral striata of 5-ALA-untreated mice (0 mg/kg). No neuronal cell loss was observed at 1 month after αS PFFs injection. (c) Quantification of TH-positive area in the striatum after 5-ALA administration. (d) Comparison of TH-positive area in the ipsilateral and contralateral SN of 5-ALA-untreated mice. (e) Area containing TH-positive neurons in the SN after 5-ALA administration. Data shown as mean ± SEM. Statistical analyses were performed using Welch’s t-test for b and d and Dunnett’s test for c and e (n = 5 for 0 mg/kg, n = 4 for 1.7 mg/kg, and n = 5 for 20 mg/kg).

**Supplementary Figure 4 Full uncropped images of immunoblotting.**

(a) Full image of α-tubulin for Fig. 2c. (b) Full image of α-tubulin for Fig. 3c. (c) Full image of α-synuclein for Fig. 3c. (d) Full image of α-tubulin for Fig. 3f. (e) Full image of α-synuclein for Fig. 3f.


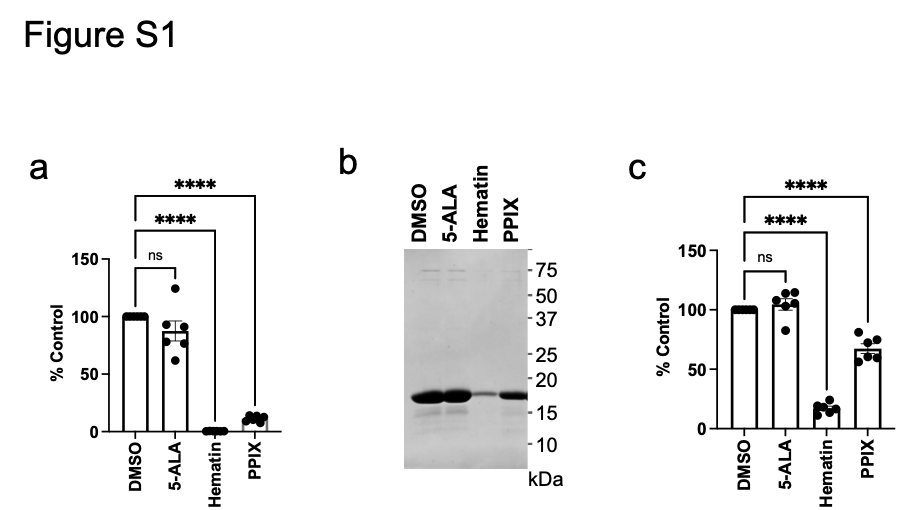


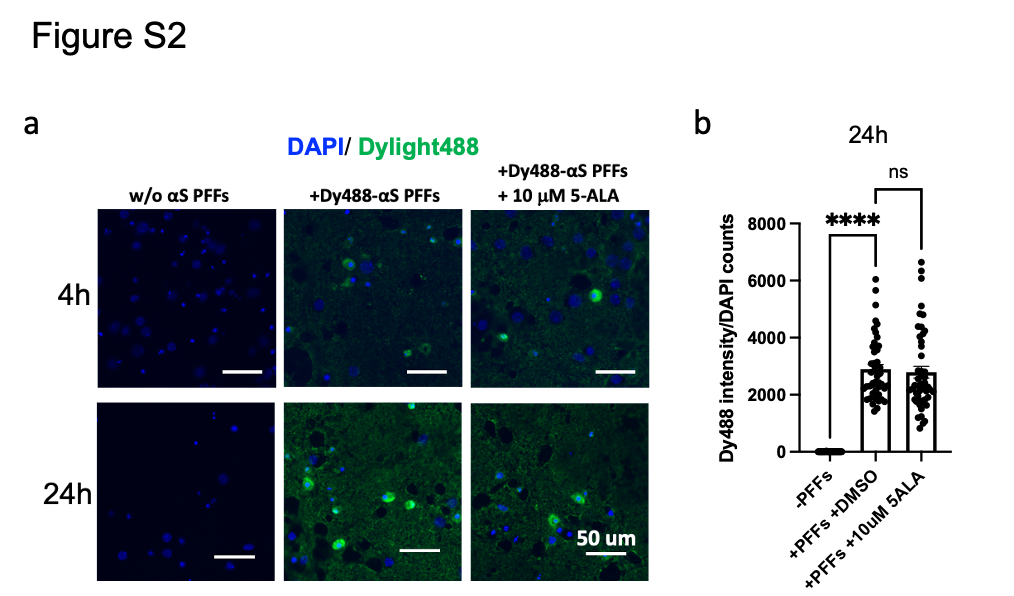


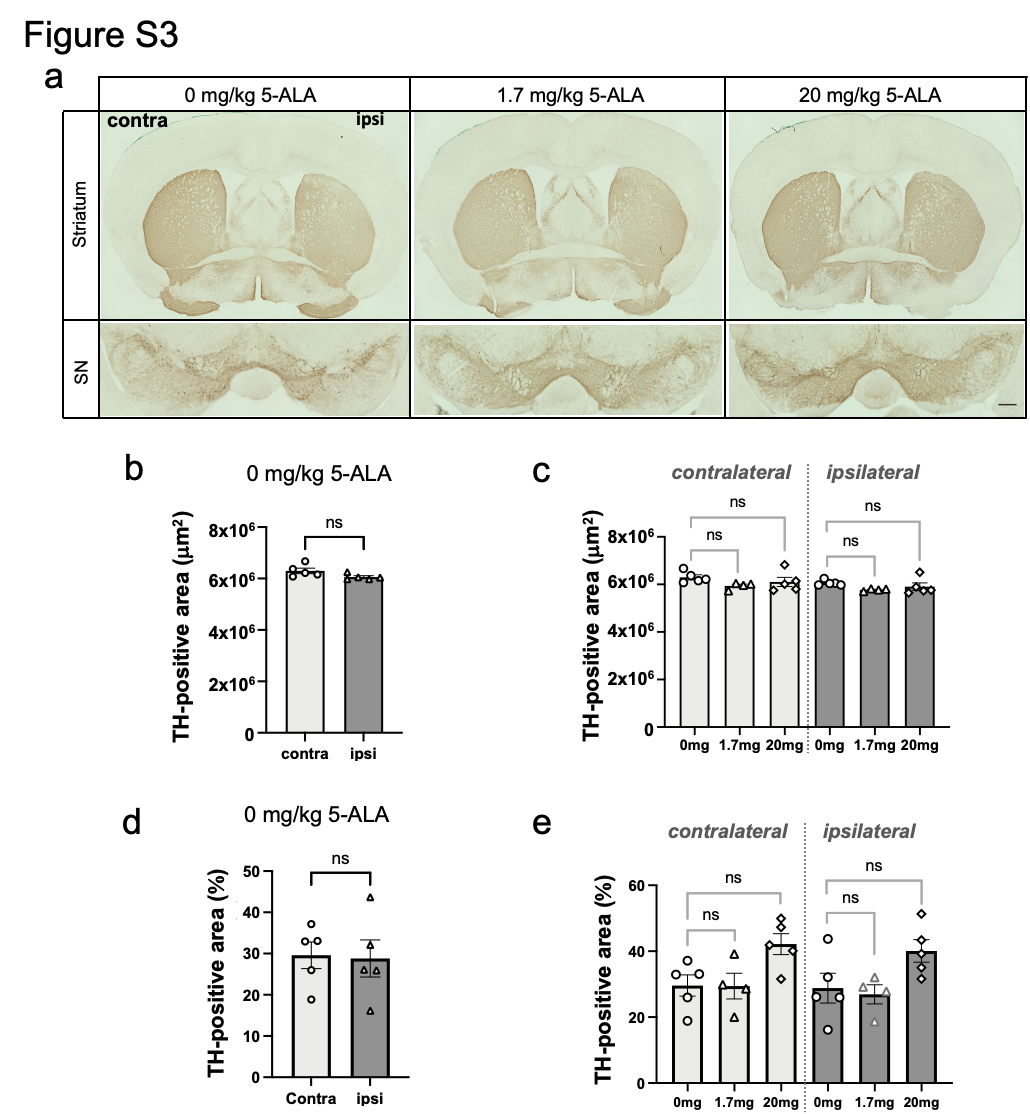


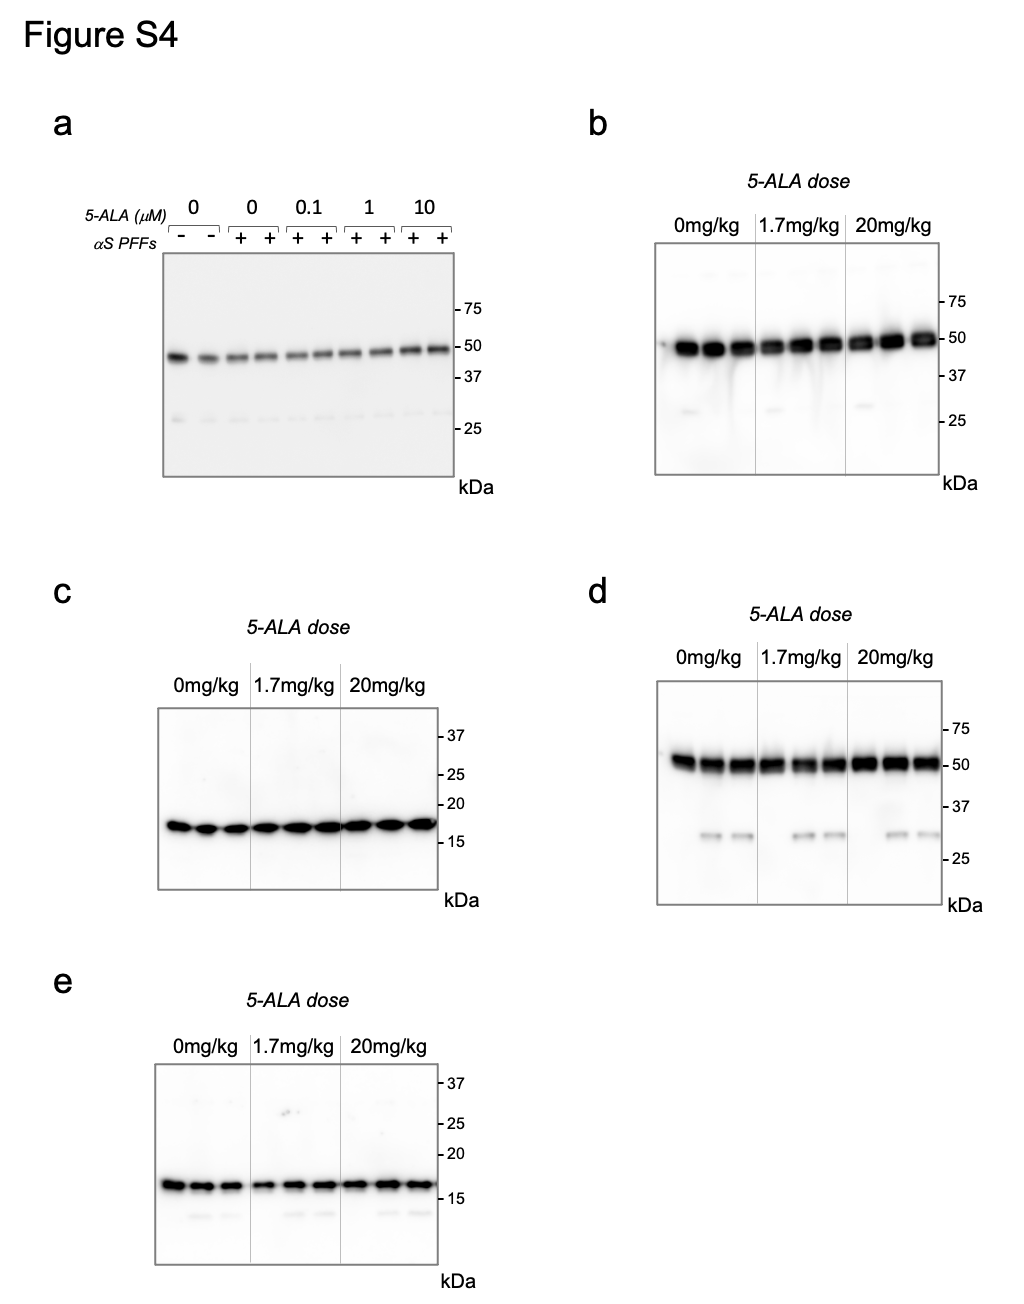


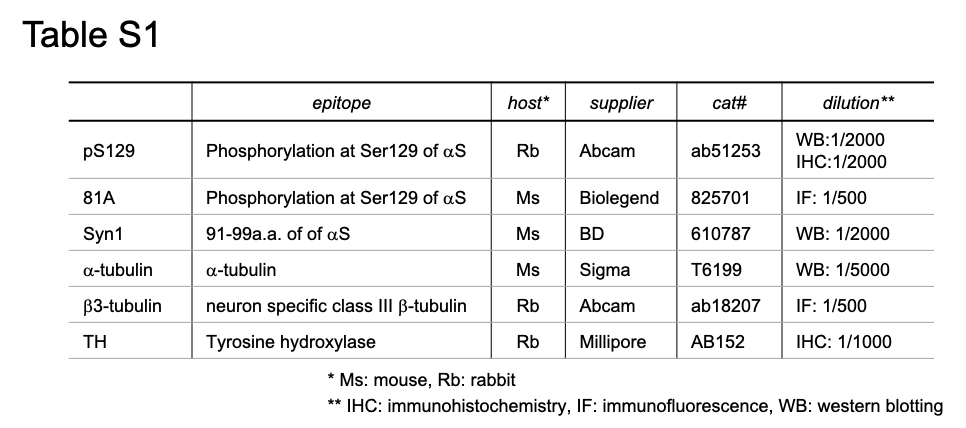

Supplement: Supplementary file 1 [file 7e6de1d54ddd053a3cb13c58.docx]
